# Supplementary material for: Conformational fluctuations in the molten globule state of α-lactalbumin
Source: Royal Society of Chemistry journal article supplement (doi:10.1039/d2cp02168d), 2022-01-01
Supplement: d2cp02168d1.pdf [file d2cp02168d1.pdf]

Electronic Supplementary Information article "Conformational  
fluctuations in molten globule state of  $\alpha$ -lactalbumin"

Abhik Ghosh Moulick<sup>a</sup> and J. Chakrabarti<sup>a</sup>

<sup>a</sup>Department of Chemical, Biological and Macro Molecular Sciences, S. N. Bose National  
Centre For Basic Sciences, Block JD, Sector III, Salt Lake, Kolkata-700098, India

Table S1: Predicted pKa values of titrable residues during CpHMD simulations at pH=2. The offset value is defined as the difference between predicted pKa and system pH. Fraction of time titrable residues remain protonated during simulations.

| Residue Name | Residue | Predicted pKa Value | Offset Value | Fraction of protonation |
|--------------|---------|---------------------|--------------|-------------------------|
| 7            | GLU     | 3.675               | 1.675        | 0.956                   |
| 11           | GLU     | 3.334               | 1.334        | 0.987                   |
| 14           | GLU     | 3.869               | 1.869        | 0.794                   |
| 25           | GLU     | 2.586               | 0.586        | 0.998                   |
| 37           | ASP     | 3.239               | 1.239        | 0.945                   |
| 46           | ASP     | 3.652               | 1.652        | 0.978                   |
| 49           | GLU     | 3.933               | 1.933        | 0.988                   |
| 63           | ASP     | 2.472               | 0.472        | 0.748                   |
| 64           | ASP     | 3.270               | 1.270        | 0.949                   |
| 78           | ASP     | 2.714               | 0.714        | 0.838                   |
| 82           | ASP     | 2.594               | 0.594        | 0.797                   |
| 83           | ASP     | 3.077               | 1.077        | 0.923                   |
| 84           | ASP     | 2.784               | 0.784        | 0.859                   |
| 87           | ASP     | 2.052               | 0.052        | 0.530                   |
| 88           | ASP     | 3.499               | 1.499        | 0.969                   |
| 97           | ASP     | 3.392               | 1.392        | 0.961                   |
| 113          | GLU     | 4.661               | 2.661        | 0.998                   |
| 116          | ASP     | 3.282               | 1.282        | 0.950                   |
| 121          | GLU     | 4.091               | 2.091        | 0.992                   |

Table S2: Putative binding sites of Oleic acid (OA) with nature and secondary element in crystal structure.

| Residue Number | Residue | Initial Structure | Nature      |
|----------------|---------|-------------------|-------------|
| 8              | VAL     | Helix             | Hydrophobic |
| 9              | PHE     | Helix             | Hydrophobic |
| 10             | ARG     | Helix             | Basic       |
| 12             | LEU     | Helix             | Hydrophobic |
| 13             | LYS     | Helix             | Basic       |
| 16             | LYS     | Helix             | Basic       |
| 17             | GLY     | Helix             | Hydrophobic |
| 19             | GLY     | Helix             | Hydrophobic |
| 20             | GLY     | Helix             | Hydrophobic |
| 21             | VAL     | Helix             | Hydrophobic |
| 23             | LEU     | Helix             | Hydrophobic |
| 26             | TRP     | Helix             | Hydrophobic |
| 27             | VAL     | Helix             | Hydrophobic |
| 31             | PHE     | Helix             | Hydrophobic |
| 32             | HIS     | Helix             | Basic       |
| 51             | GLY     | Loop              | Hydrophobic |
| 52             | LEU     | Loop              | Hydrophobic |
| 53             | PHE     | Loop              | Hydrophobic |
| 55             | ILE     | Sheet             | Hydrophobic |
| 58             | LYS     | Loop              | Basic       |
| 59             | ILE     | Loop              | Hydrophobic |
| 60             | TRP     | Loop              | Hydrophobic |
| 89             | ILE     | Helix             | Hydrophobic |
| 90             | MET     | Helix             | Hydrophobic |
| 92             | VAL     | Helix             | Hydrophobic |
| 93             | LYS     | Helix             | Basic       |
| 94             | LYS     | Helix             | Basic       |
| 95             | ILE     | Helix             | Hydrophobic |
| 96             | LEU     | Helix             | Hydrophobic |
| 98             | LYS     | Helix             | Basic       |
| 99             | VAL     | Helix             | Hydrophobic |
| 100            | GLY     | Helix             | Hydrophobic |
| 101            | ILE     | Helix             | Hydrophobic |
| 104            | TRP     | Helix             | Hydrophobic |

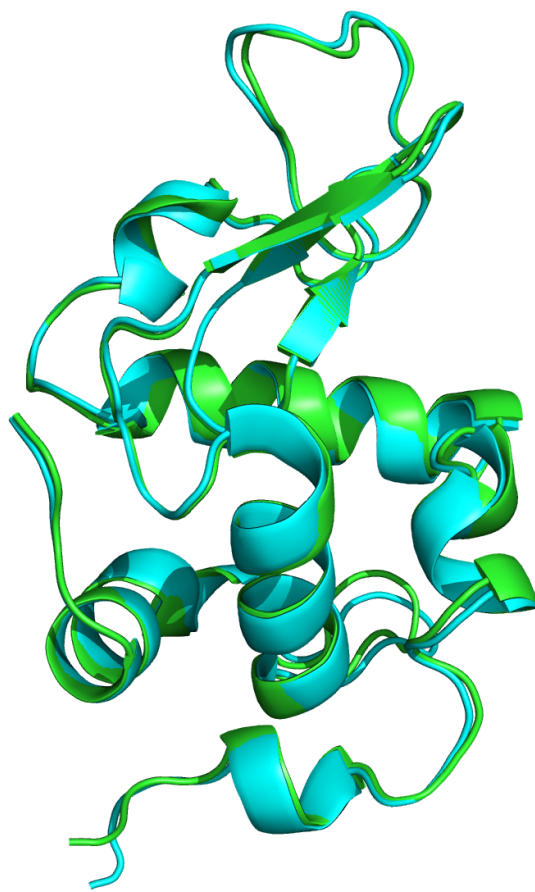

Figure S1: Overlapped average structure obtained from normal MD simulation (green) and constant pH MD simulations (cyan) at neutral pH. Root mean square distance between two structure is  $0.479 \text{ \AA}$ .

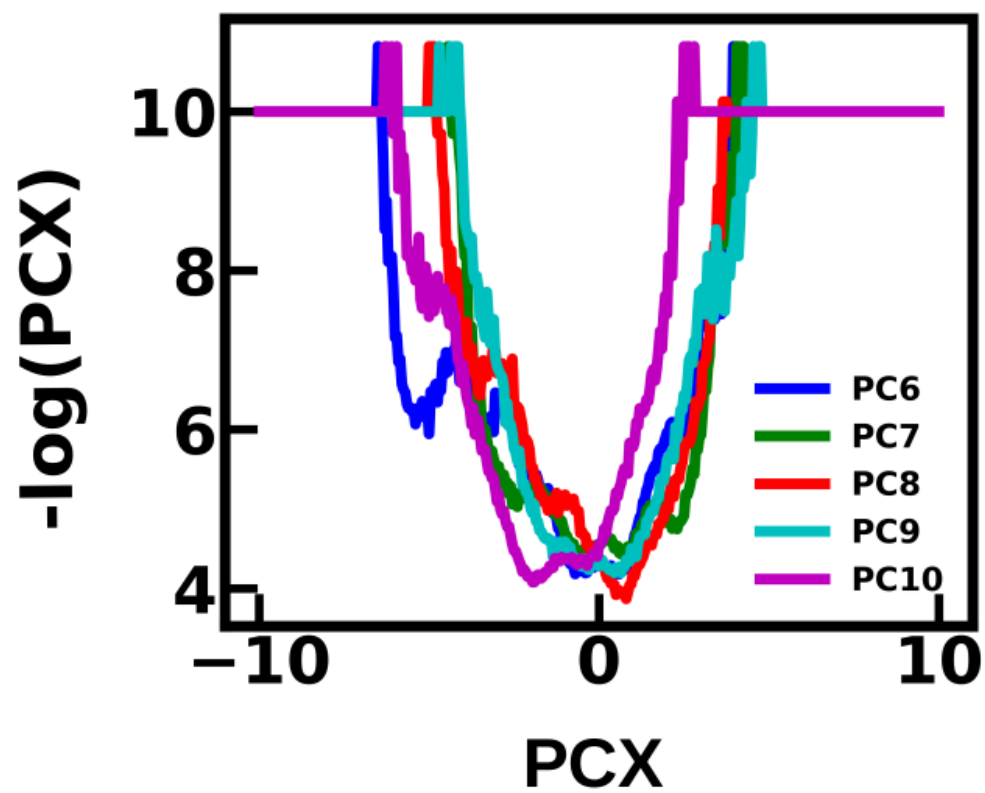

Figure S2: Free energy landscape obtained from dPCA+ for PC6-PC10. Metastability decrease gradually for higher PCs.

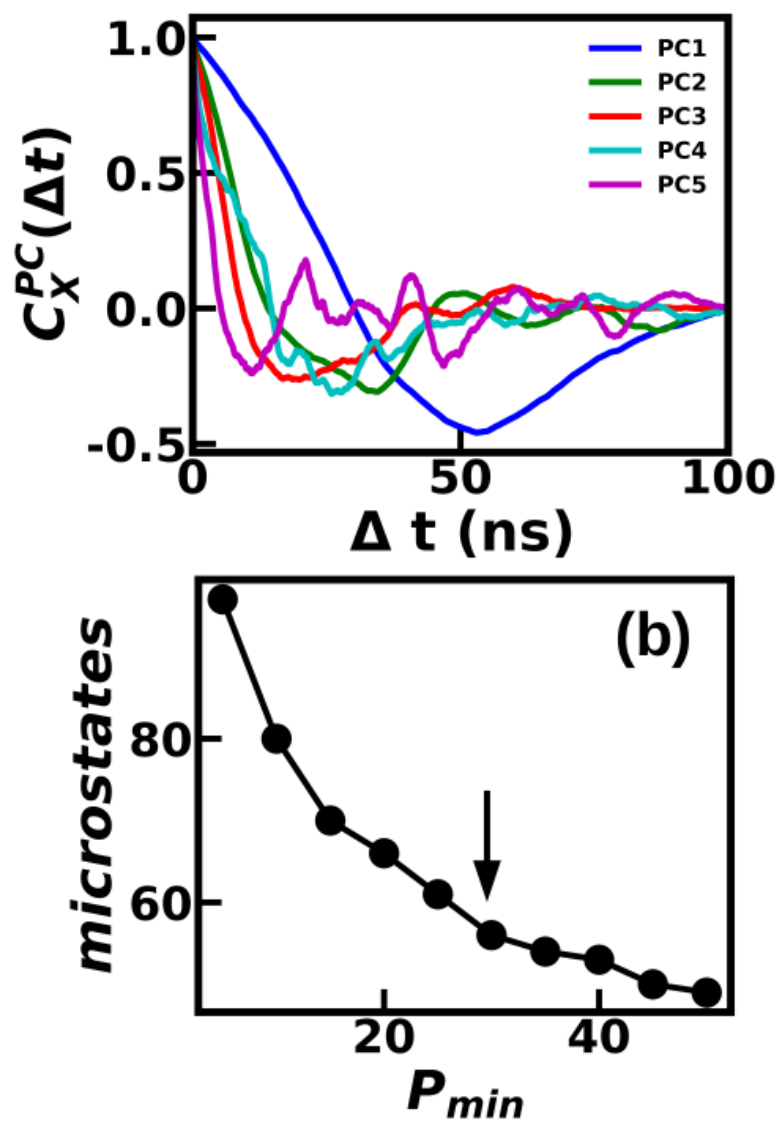

Figure S3: (a) Autocorrelation function of principal component 1-5, (b) Number of microstate, plotted as function of the minimal population  $P_{min}$ .  $P_{min}=30$  (shown by arrow) value used in the analysis to avoid initial drop .

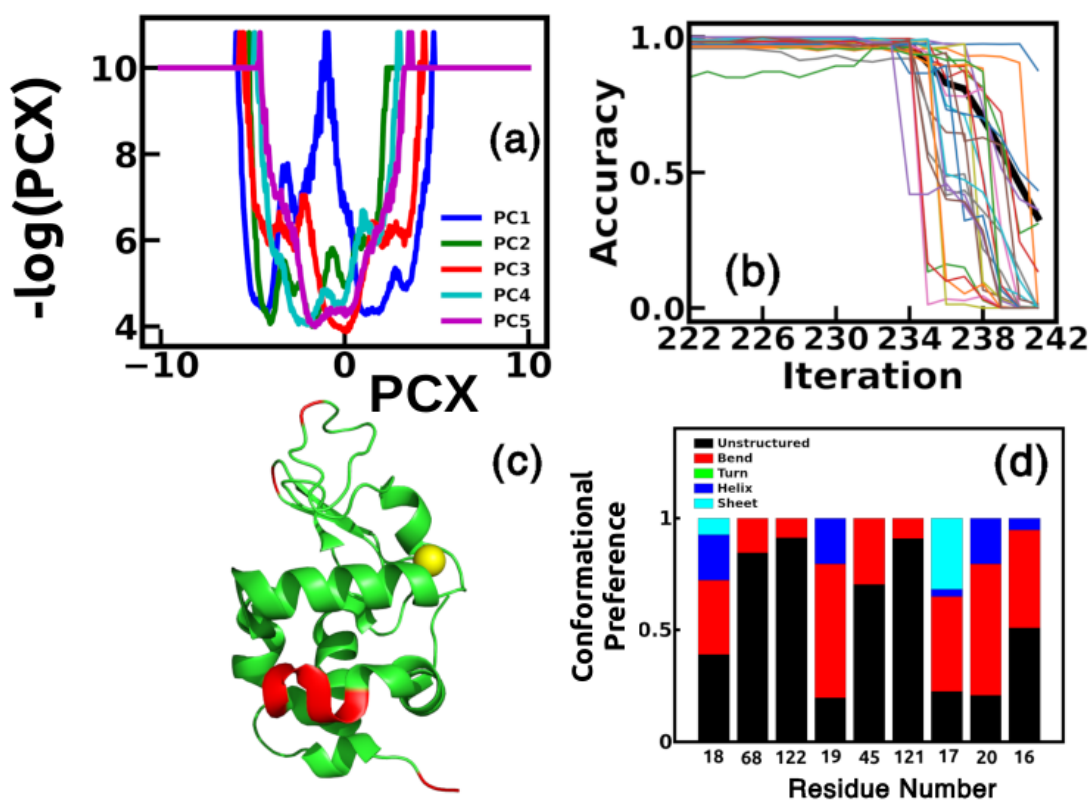

Figure S4: Identification of essential coordinate for apo ( $\text{Ca}^{2+}$  ion is shown for better understanding) protein applying constant pH simulation at pH7. (a) Principal component obtained from dPCA+ analysis. PCs 1-5 are shown in figure. (b) Accuracy loss plot of XGBoost classifier. The figure is shown as a function of number of discarded coordinate. Accuracy of all metastable states drops drastically upon removing of mostly last 10 coordinates., (c) Residues having essential coordinates are marked in initial crystal structure. They are colored in red. For better understanding, we keep the calcium ion. (d) Conformational preference of those residues having essential coordinates.

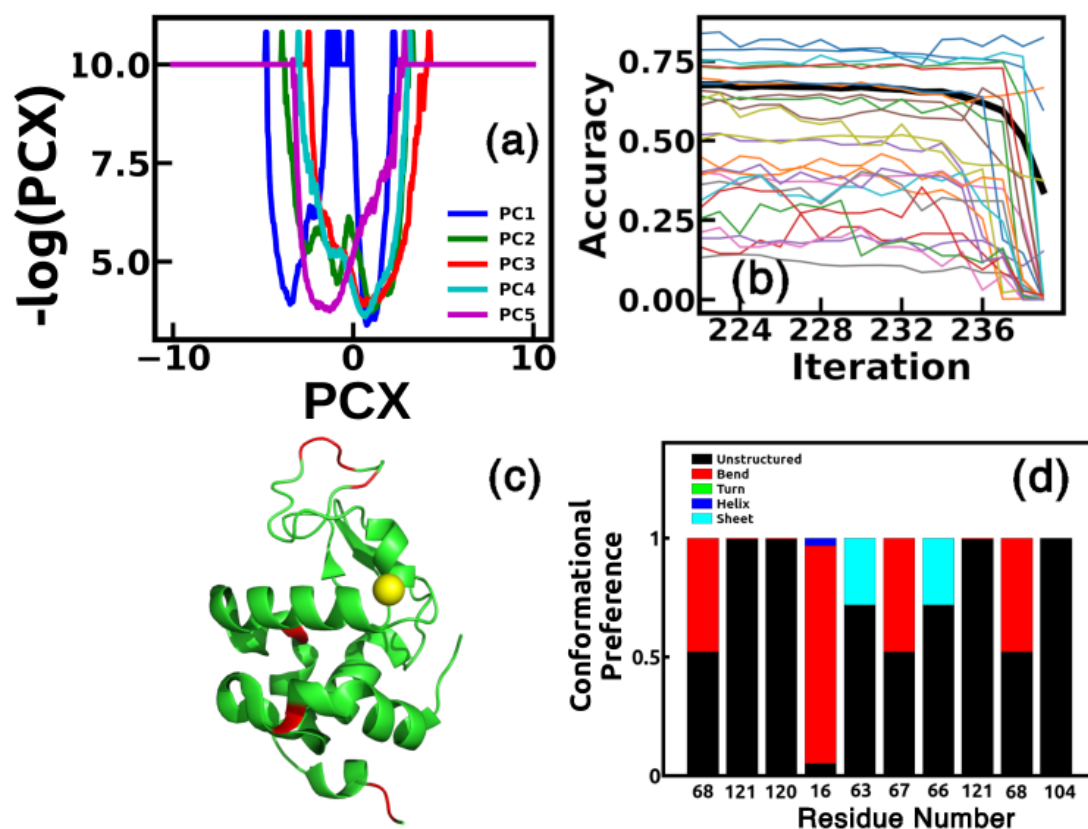

Figure S5: Identification of essential coordinate for holo protein using unbiased molecular dynamics simulation at neutral pH. (a) Principal component obtained from dPCA+ analysis. PCs 1-5 are shown in figure. (b) Accuracy loss plot of XGBoost classifier. The figure is shown as a function of number of discarded coordinate. Accuracy of all metastable states drops drastically upon removing of mostly last 10 coordinates., (c) Residues having essential coordinates are marked in initial crystal structure. They are colored in red. All non-essential residues belong to loop region. For better understanding, we keep the calcium ion. (d) Conformational preference of those residues having essential coordinates.



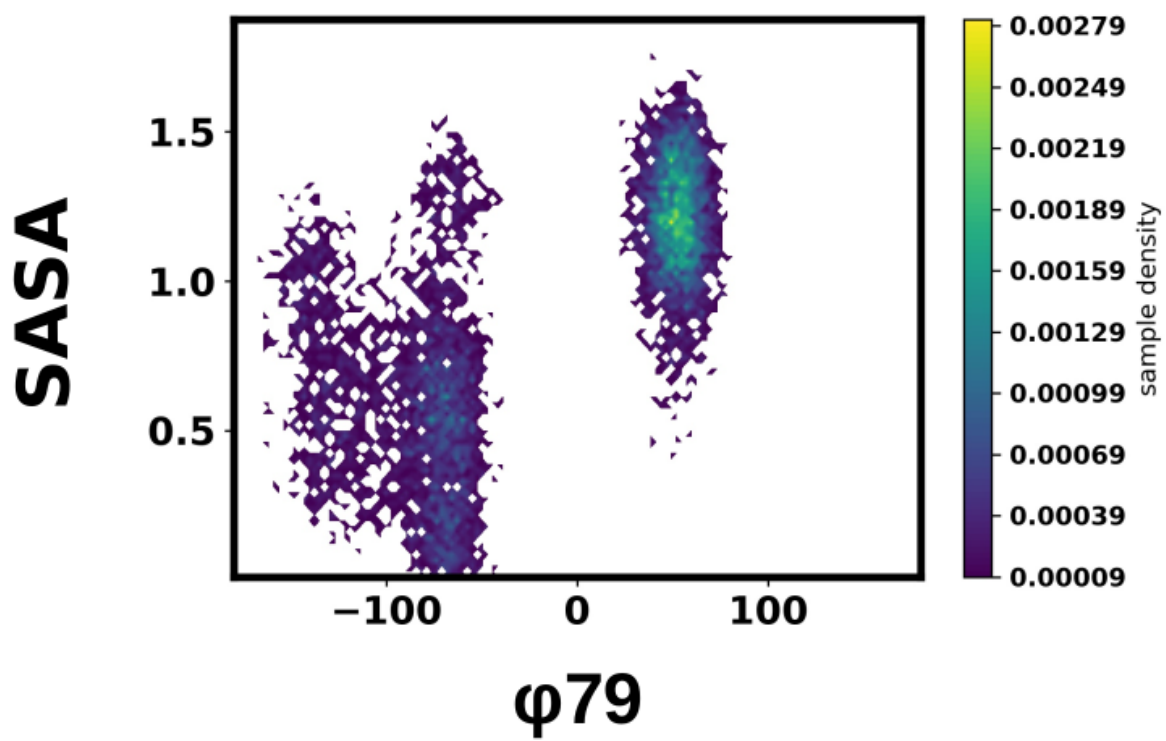

Figure S6: Correlation plot between SASA value of ILE89 with dihedral  $\phi$  fluctuations of res LYS79.
